# Supplementary material for: High pressure synthesis of a quasi-one-dimensional GdFeO3-type perovskite PrCuO3 with nearly divalent Cu ions
Source: Royal Society of Chemistry journal article supplement (doi:10.1039/c9cc04656a), 2019-01-01
Supplement: c9cc04656a1.pdf [file c9cc04656a1.pdf]

Electronic Supporting Information for:

## **High pressure synthesis of quasi-one-dimensional GdFeO<sub>3</sub>-type perovskite PrCuO<sub>3</sub> with nearly divalent Cu ions**

Masaharu Ito,<sup>a</sup> Hidefumi Takahashi,<sup>a,b</sup> Hideaki Sakai,<sup>a,c,d</sup> Hajime Sagayama,<sup>e</sup> Yuichi Yamasaki,<sup>d,f,g</sup>  
Yuichi Yokoyama,<sup>f,h</sup> Hiroyuki Setoyama,<sup>i</sup> Hiroki Wadati,<sup>h</sup> Kanako Takahashi,<sup>a</sup> Yoshihiro Kusano,<sup>j</sup>  
Shintaro Ishiwata\*<sup>a,b,d</sup>

<sup>a</sup>Department of Applied Physics and Quantum Phase Electronics Center (QPEC), University of Tokyo, Tokyo 113-8656, Japan.

<sup>b</sup>Division of Materials Physics, Graduate School of Engineering Science, Osaka University, Toyonaka, Osaka 560-8531, Japan.

<sup>c</sup>Department of Physics, Osaka University, Toyonaka, Osaka 560-0043, Japan.

<sup>d</sup>PRESTO, Japan Science and Technology Agency, Kawaguchi, Saitama 332-0012, Japan.

<sup>e</sup>Institute of Materials Structure Science, High Energy Accelerator Research Organization, Tsukuba, Ibaraki 305-0801, Japan.

<sup>f</sup>Research and Services Division of Materials Data and Integrated System (MaDIS), National Institute for Materials Science (NIMS), Ibaraki, Tsukuba 305-0047, Japan.

<sup>g</sup>RIKEN Center for Emergent Matter Science (CEMS), Wako, Saitama 351-0198, Japan.

<sup>h</sup>Institute for Solid State Physics, University of Tokyo, Chiba 277-8581, Japan.

<sup>i</sup>Kyushu Synchrotron Light Research Center, 8-7 Yayoigaoka, Tosu, Saga 841-0005, Japan.

<sup>j</sup>Department of Applied Chemistry and Biotechnology, Okayama University of Science, 1-1 Ridai-cho, Kita-ku, Okayama 700-0005, Japan

\* E-mail: ishiwata@mp.es.osaka-u.ac.jp

## 1. High pressure synthesis

We have performed high pressure oxygen annealing for the oxygen deficient perovskite  $\text{PrCuO}_{2.5}$  at several temperatures 420-500 °C under a high pressure of 7.5 GPa. Since  $\text{NaClO}_3$  does not release oxygen below 420 °C and the impurity phase of  $\text{PrO}_2$  appears above 450 °C, we concluded that the optimum annealing temperature is about 440 °C at a high pressure of 7.5 GPa. Furthermore, we have confirmed that the oxidizer  $\text{NaClO}_3$  should be mixed with the oxygen deficient perovskite  $\text{PrCuO}_{2.5}$  to obtain the fully oxidized  $\text{PrCuO}_3$ .

The XRD patterns of  $\text{PrCuO}_{2.5}$  and  $\text{PrCuO}_3$ , which was obtained by the high-pressure oxygen annealing for  $\text{PrCuO}_{2.5}$  at 450 °C and 7.5 GPa, are shown in Fig. S1. All the peaks for  $\text{PrCuO}_{2.5}$  can be indexed with an orthorhombic unit cell ( $Pbam$ ) with  $a = 5.584 \text{ \AA}$ ,  $b = 10.353 \text{ \AA}$ ,  $c = 3.828 \text{ \AA}$ . The main peaks for  $\text{PrCuO}_3$  can be indexed with an orthorhombic unit cell ( $Pbnm$ ) with  $a = 5.301 \text{ \AA}$ ,  $b = 6.245 \text{ \AA}$ ,  $c = 7.278 \text{ \AA}$ . The 020 reflection with asterisk is superimposed by the main reflection from the impurity phase of  $\text{PrO}_2$ , which is absent in the sample obtained at 440 °C and 7.5 GPa.

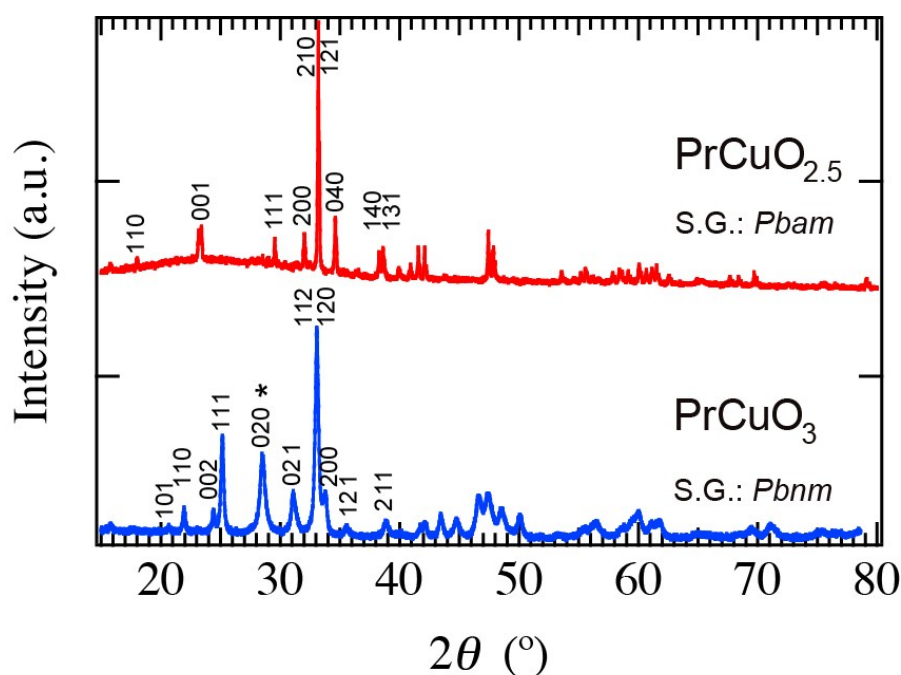

Fig. S1: XRD patterns for  $\text{PrCuO}_{2.5}$  and  $\text{PrCuO}_3$  measured by a Cu  $K\alpha$  radiation.

## 2. Linear interpolation analyses for XANES spectra

As shown in Fig. 4, the pre-edge structure below 8995 eV, which corresponds to the quadruple transition, is prominent especially for CuO. In order to minimize the effect of the pre-edge structure on the estimation of the absorption edge energy, we chose the intersection of the horizontal line for the linear interpolation analyses as shown in the inset of Fig. 4 (the horizontal line is located at 70% of the maximum value). On the basis of the energies of intersections for CuO and LaCuO<sub>3</sub>, we define that the absorption edge energies for Cu<sup>2+</sup> and Cu<sup>3+</sup> states are 8996.5 eV and 8997.6 eV, respectively. Provided that the oxidation state of Cu is linearly proportional to the absorption edge energy (the linear interpolation analysis),<sup>25</sup> the oxidation state of Cu in PrCuO<sub>3</sub> is calculated to be +2.2.
